# Supplementary material for: Bioinformatic analysis and identification of potential prognostic microRNAs and mRNAs in thyroid cancer
Source: PubMed Central journal article supplement (PMC5937477; doi:10.7717/peerj.4674), 2018-05-04

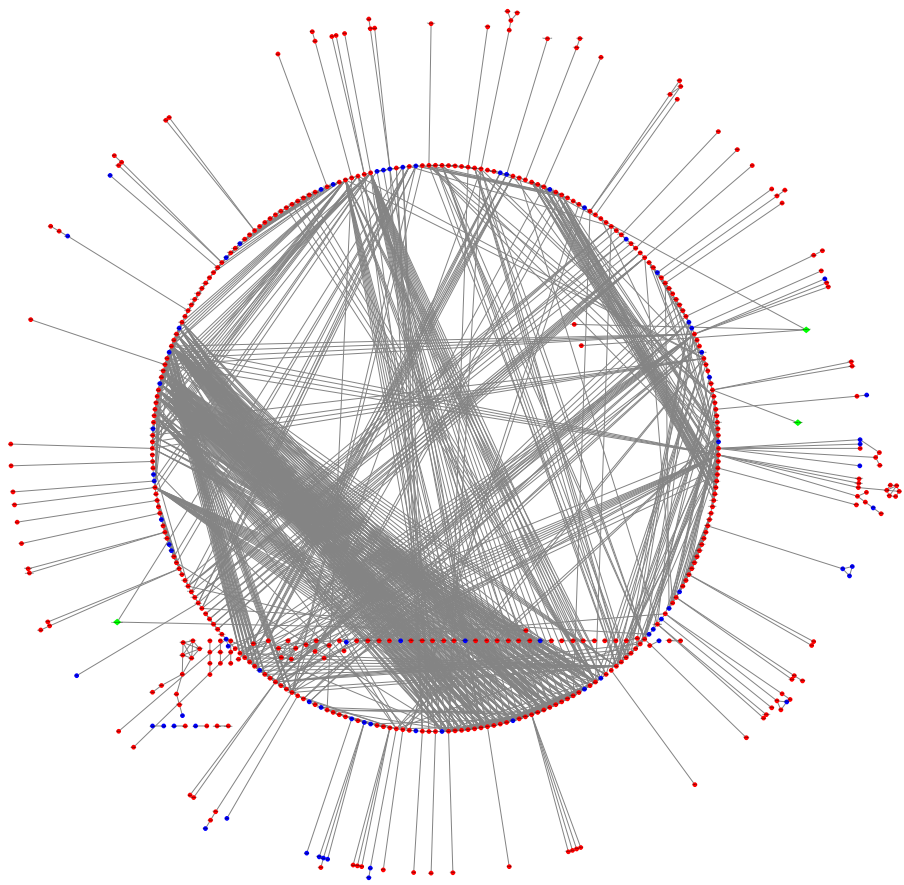

Supplement: peerj-06-4674-s003.pdf [file peerj-06-4674-s003.pdf]
